# Supplementary material
Source: Springer Nature journal article supplement (https://www.springermedizin.de/resource/supplementary/13000_2012_649_MOESM2_ESM.pdf/9624844)

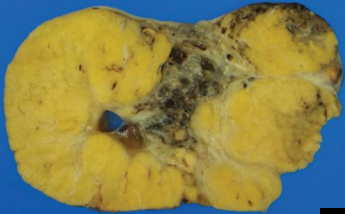

**a**

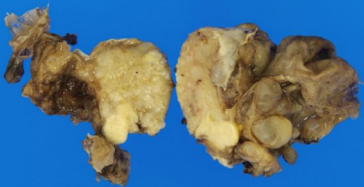

**b**

Supplement: MOESM2 [file 9624844]
